# Supplementary material for: New particle formation induced by anthropogenic-biogenic interactions in the southeastern Tibetan Plateau
Source: Copernicus journal article supplement (doi:10.5194/egusphere-2023-1848), 2023-09-22
Supplement: Supplementary file [file egusphere-2023-1848-AC1-supplement.pdf]

### **General comments:**

*New particle formation (NPF) is essential for understanding aerosol dynamics, particularly in climate-sensitive regions like the Tibetan Plateau (TP). To address the knowledge gaps specific to NPF in the TP, the authors conducted a study that combined field measurements and modeling, revealing frequent NPF events in the southeastern TP. Lulang, characterized by relatively low anthropogenic emissions but high biogenic emissions and trace-level SO<sub>2</sub> concentrations, along with high monoterpene concentrations, served as a pertinent study area.*

*To assess the influence of biogenic volatile organic compounds (BVOCs) and atmospheric transport on NPF in Lulang, a well-chosen set of regional simulations was performed using the updated WRF-Chem model during a typical NPF episode. For the most part, the conclusions were substantiated. The inclusion of organic NPF pathways helped bridge remaining gaps and yielded good agreement with observations, underscoring the vital role of organic compounds in nucleation. Crucially, oxygenated organic molecules resulting from monoterpene oxidation were identified as pivotal for NPF. The model updates successfully replicated observed NPF, highlighting the dominant nucleation mechanism involving sulfuric acid, ammonia, and highly oxygenated organic molecules. Vertical transport was found to have a substantial impact on NPF in the southeastern TP, emphasizing the significance of anthropogenic-biogenic interactions and meteorological dynamics. The analysis disclosed that nucleation primarily drives the production of near-ground particles below 10 nm range, while vertical mixing enhances particle concentration in larger size ranges near the ground. These findings underscore the importance of vertical mixing in redistributing particles within the southeastern TP.*

*In conclusion, this well-written and compelling paper provides valuable insights into the complex dynamics of NPF, focusing on the roles of different precursors and meteorological factors in the formation and growth of aerosol particles. However, I have some reservations about two aspects: the potential limitations of the 27 km grid resolution and the climatology of NPF events, specifically the model's ability to accurately represent the vertical transport of aerosols back into the boundary layer.*

**Response:** We would like to thank the referee for providing the insightful suggestions, which indeed help us further improve the manuscript.

### **Specific comments:**

*Comment 1: Page 5, line 109-113 “(Fig. 1a). In general, the measurement site is characterized by extensive emissions of BVOCs, especially monoterpenes ... (Fig. 1b).”*

*Please provide more details regarding the sources, data level, and resolution depicted in Figures 1a and 1b. The mention of a "nearby cottage" prompts the need for clarification: is this a single cottage, or does it represent a local distribution of cottages surrounding the measurement site? This is particularly crucial in assessing the direct emissions originating from these cottages.*

**Response:** Thanks for the comment. The biogenic emissions in Figure 1a were calculated online by using the Model of Emissions of Gases and Aerosols from Nature (MEGAN) that embedded in WRF-Chem (Guenther et al., 2006). This module estimates the net emission rates of monoterpene, isoprene, and other BVOCs from terrestrial ecosystems to the above-canopy atmosphere. Anthropogenic emissions are obtained from the mosaic Asian anthropogenic emission inventory (MIX) at 0.25°×0.25° horizontal resolution and a monthly temporal resolution for the year 2010, with specific emissions for China sourced from the Multi-resolution Emission Inventory for China (MEIC) at 0.25°×0.25° horizontal resolution for 2017 (<http://meicmodel.org.cn>) (Li et al., 2017b). Anthropogenic emissions encompass those from power plants, residential combustion, industrial processes, on-road mobile sources, and agricultural activities (Li et al., 2017b). Figures 1a and 1b were plotted at the model resolution (27 km). In response to your valuable comments, we have included additional details in the Lines 175–177 in Section 2.2 and the captions of Figure 1 (Lines 122–126).

Regarding the biomass burning signals in the morning, there was a single residential cottage close to the site, which emitted pollutants by burning wood at almost regular morning hours. It is crucial to note that these biogenic burning signals represent highly localized emissions, which need to be excluded from data analysis. In line with your suggestion, we have clarified the role of the cottage in the Lines 113–114 in the revised Section 2.1 of the manuscript.

*Comment 2: Page 7, line 132-134 "Besides, on a typical NPF day, such as 29 April 2021, ..."*

*Please explain the climatology/frequency of NPF days and describe the nature of a typical NPF day. As there have been no references to NPF events thus far, providing some context regarding the occurrence of NPF events at the study location would be helpful.*

**Response:** Thanks for the comment. On typical NPF days, the contour plot depicting particle number size distributions over time at a fixed location often exhibits a "banana shape". The banana-shaped NPF event signifies the regional occurrence of this phenomenon, spanning a minimum radius of a few tens of kilometers (Kulmala et al., 2012). We applied a methodology proposed by Dal Maso et al. (2005) to identify NPF-event days during our 47-day

campaign, revealing a total of 10 NPF days. This frequency is slightly lower than observations during the monsoon season, where over 80% (31/38 days) of days were reported to exhibit NPF by Cai et al. (2018). The relatively moderate frequency during our campaign could be attributed to factors such as high cloud coverage, frequent rain, and low radiation during the pre-monsoon period. Notably, on clear sky days, more than 60% were identified as NPF event days.

While NPF studies over the Tibetan Plateau (TP) are limited due to challenges in in-situ observations under extreme meteorological and topographic conditions, previous studies reported a high frequency of NPF events in TP. For instance, Tang et al. (2023) observed frequent NPF (80%) at Nam Co station (4730m a.s.l.) in the central TP during monsoon season. Long-term NPF measurements at the Himalayan Nepal Climate Observatory at Pyramid (NCO-P) site on the southern TP showed very frequent NPF events (~50%) (Venzac et al., 2008). These studies emphasize the significance and climatology of NPF in TP.

To address your concern, we have added detailed descriptions of the NPF events in the Lines 142–143 in Section 2.1 and in the Lines 295–297 Section 3.1 of the revised manuscript. Additionally, we have included a table providing statistics on NPF events in the supplementary information for further clarification (Table R1).

*Comments 3: Page 7: line 146-147- “In this study, the simulation domain covers the southeastern TP, with a grid resolution of 27 km and 30 vertical layers... 100 hPa.”*

*What uncertainties are linked to the coarser model resolution? Can a grid resolution of 27 km adequately capture certain cloud structures, sub-regional aerosol and cloud variations, and boundary layer dynamics?*

**Response:** Thank you for your comment. The choice of a 27 km resolution for the simulation domain was made to strike a balance between computational efficiency and the need to capture regional-scale atmospheric processes over the southeastern Tibetan Plateau. We appreciate your concern about potential uncertainties linked to this coarser model resolution.

The intricate terrain of the TP poses challenges for coarse-resolution simulations, particularly in accurately representing orographic effects and fine-scale atmospheric processes. Coarse horizontal resolutions may struggle to capture meso- and micro-scale weather systems closely tied to complex terrain (Lindzen et al., 1983; Wang et al., 2020). Additionally, challenges arise in representing convection, cloud microphysics, and boundary layer dynamics at coarser resolutions (Sato et al., 2008; Jain et al., 2019; Mishra et al., 2018).

As widely acknowledged, accurate simulation of certain cloud structures and prediction of sub-regional dynamics are both challenging for regional/global models and even for convective-permitting models, especially on the TP. Studies have shown that increasing spatial resolution does not always lead to higher accuracy due to uncertainties in physics parameterizations and numerical algorithms (Zhang et al., 2013; Wehner et al., 2014; Bacmeister et al., 2014; Yu et al., 2015; Hart et al., 2005). While the 27 km resolution may not fully capture sub-regional cloud structures and aerosol distribution, it is crucial to emphasize that our primary focus is on regional-scale dynamics. Several studies with similar resolutions have demonstrated the model's ability to reproduce observations within an acceptable bias range (Li et al., 2015; Shi et al., 2008; Gao et al., 2018; Yang et al., 2018; Xu et al., 2018; Rai et al., 2022). Gao et al. (2018) found the improved performance of precipitation simulations over the Tibetan Plateau with the WRF model at around 30 km resolution compared to coarser resolution GCMs and reanalysis. Yang et al. (2018), utilizing the WRF-Chem model at 25 km resolution, demonstrated an appropriate representation of the position of the rain band and near-surface aerosol concentrations.

Although the 27 km and 30 layers resolution introduce limitations in capturing fine-scale boundary layer dynamics, studies (Ding et al., 2016; Huang et al., 2020) have indicated that, for regional-scale simulations, the use of 27 km and 30 layers resolution model on the representation of boundary layer processes is within an acceptable range.

In summary, the choice of a 27 km and 30 layers resolution represents a compromise between computational efficiency and the need to capture key regional-scale atmospheric processes over the southeastern Tibetan Plateau. While uncertainties accompany 27 km and 30 layers resolution, especially in representing fine-scale features, previous studies and the specific goals of our research support the chosen resolution. Considering referee's points, we have incorporated additional discussions to address the concerns of uncertainties linked to model resolution in the revised Section 2.2 of the manuscript (Lines 160–164).

*Comment 4: Page 9, Table 1- The authors mention the MB and RMSE over the entire study period. It's important to understand whether the model captures the diurnal variability of meteorological factors, aerosols, and trace gas components. This is especially critical for accurately reproducing NPF characteristics. While the table describes the comparison at Lulang, and the average values seem promising, is it possible to compare/validate the regional distribution of some of these parameters?*

**Response:** Thanks for the comment. To address your concerns, we have added the

evaluations of our model's performance by incorporating a comparison of the spatial patterns of observed 2-meter temperature, 10-meter wind speed, SO<sub>2</sub> concentrations, and PM<sub>2.5</sub> concentrations with model simulations.

Fig. R1a-d illustrates the comparison of our simulation results with observed meteorological fields obtained from the Integrated Surface Database (<https://www.ncei.noaa.gov/products/land-based-station/integrated-surface-database>). The model demonstrates a commendable ability to capture the topographically induced contrast in temperature between the Tibetan Plateau and South Asia, as well as accurately representing wind speed patterns.

To further validate the regional distribution of key parameters, we utilized air quality data from Chinese national monitoring stations, sourced from the China National Environmental Monitoring Centre. Specifically, our focus was on evaluating the model's simulation of NPF-relevant pollutants, e.g. SO<sub>2</sub> and PM<sub>2.5</sub>. Fig. R1e-h presents the spatial patterns of SO<sub>2</sub> and PM<sub>2.5</sub> concentrations, highlighting the model's effectiveness in capturing the regional distribution of these pollutants.

Considering the referee's points, these additional evaluations of spatial distributions have been incorporated into the revised Section 2.2 (Lines 200–205) of the manuscript and Fig. S1 in the supplementary information.

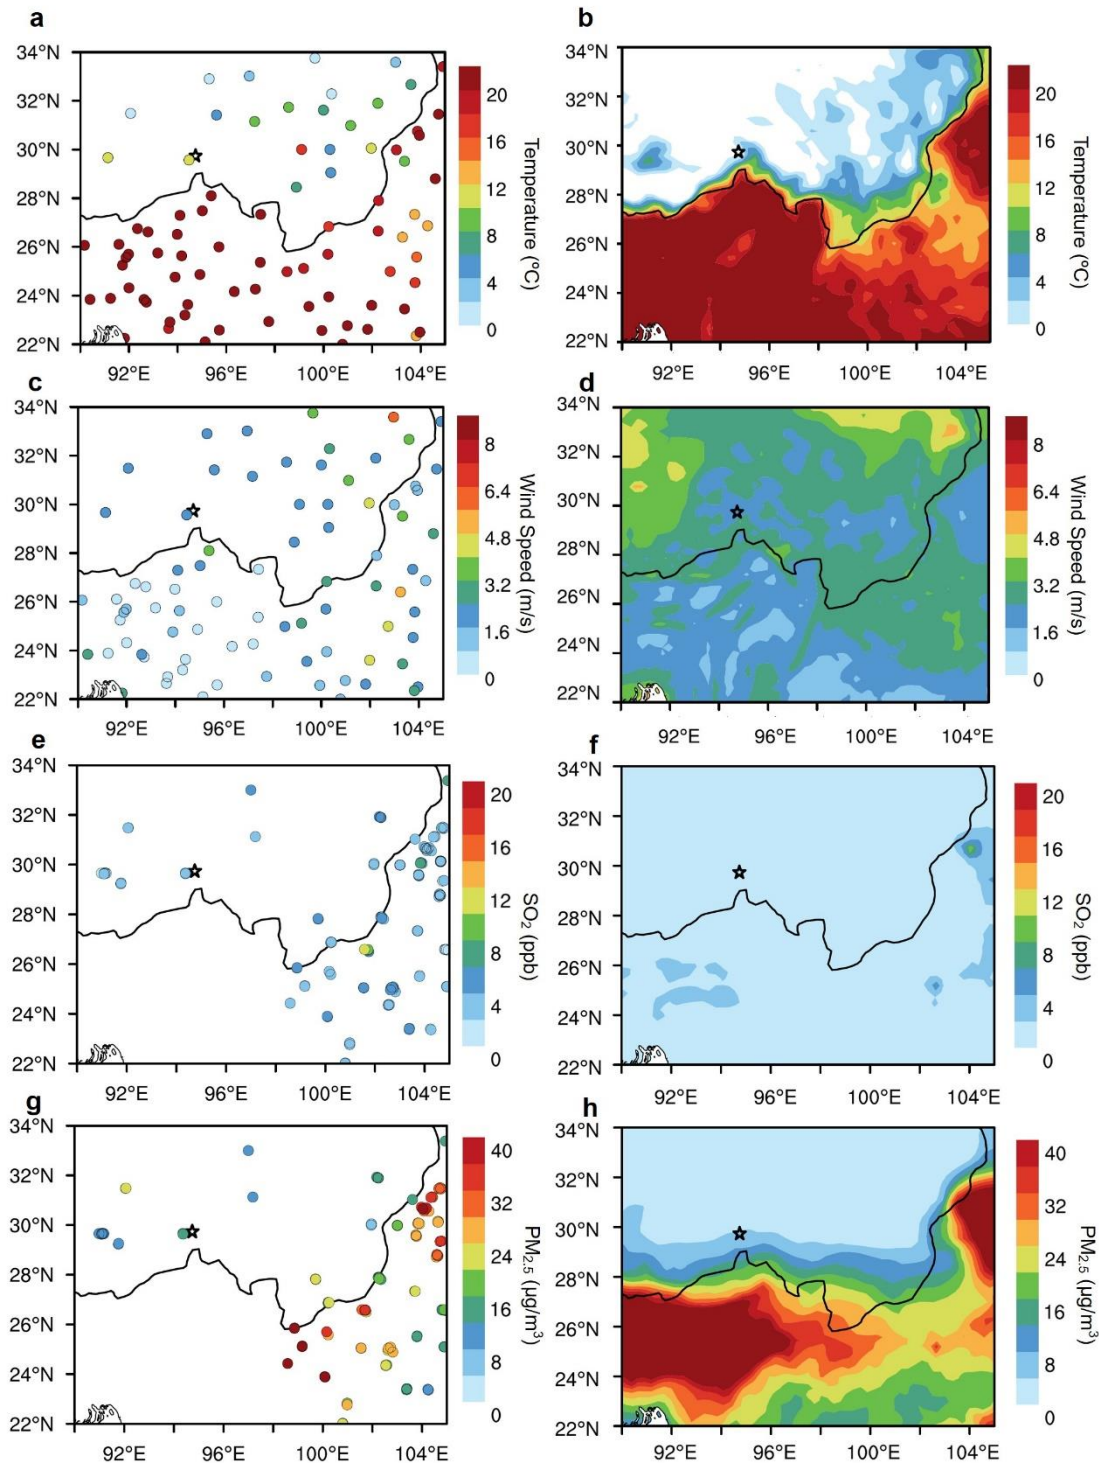

Fig. R1. Averaged spatial distributions of (a) observed and (b) simulated 2-m temperature during 28–30 April. Averaged spatial distributions of (c) observed and (d) simulated 10-wind speed temperature during 28–30 April. Averaged spatial distribution of (e) observed  $\text{SO}_2$  at Chinese national air quality monitoring stations and (f) simulated  $\text{SO}_2$  concentrations during 28–30 April. Averaged spatial distribution of (g) observed  $\text{PM}_{2.5}$  concentrations at Chinese national air quality monitoring stations and (h) simulated  $\text{PM}_{2.5}$  concentrations during 28–30 April. Here, the surface weather data are

accessible at the Integrated Surface Database (<https://www.ncei.noaa.gov/products/land-based-station/integrated-surface-database>). The air quality dataset at the national monitoring stations is available from the China National Environmental Monitoring Centre (<http://www.pm25.in>).

*Comment 5: Page 12, Figure 3- Some of the NPF days showed morning peaks in number concentrations, which were associated with wood burning in a nearby residential cottage. Is this a regular practice? If so, residential burning near the measurement site could regularly influence NPF formation. For instance, on April 30th, it appears that NPF growth is influenced by the introduction of particles from wood burning. Is this phenomenon very local or more regional? If this practice is very localized, can the results be considered as specific to this region and not applicable to a larger area such as southern TP?*

**Response:** Thanks for the comment. The morning peaks in number concentrations during 28-40 April, as illustrated in Fig. 3, are associated with wood burning in single nearby residential cottage. This practice is a regular occurrence during morning hours. It is essential to clarify that these biogenic burning signals are specific to very local emissions originating from the mentioned cottage. To assess the potential impact of this local burning on NPF, we examined black carbon (BC) concentrations measured by The Multi-Angle Absorption Photometer (MAAP, Thermo-Scientific Inc.) at our site. Notably, the BC concentration was extremely high during the wood burning period while relatively low during NPF event in the afternoon (Fig. R2). This observation suggests that the NPF growth process is minimally influenced by wood burning, reinforcing the notion that our results can be considered applicable to the regional scale. Furthermore, the characteristic "banana" shape in the particle number size distribution surface plot, as depicted in Fig. 3, signifies that nucleation and growth processes occur on a regional scale. This "banana" shape is a well-established criterion for identifying regional NPF events (Kulmala et al., 2012). This supports the generalizability of our findings beyond the localized impact of the nearby cottage, affirming the regional significance of NPF event. Meanwhile, the simulation results also support that the NPF event occurred on a regional scale in the southeastern Tibetan Plateau. Considering the referee's points, we have added more discussions in the Lines 297–299 in the revised Section 3.1 of the manuscript and added Fig. R2 in Supplement Information.

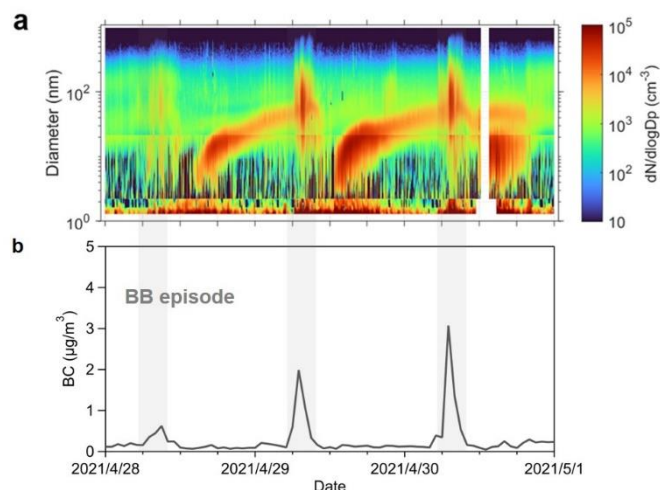

Fig. R2. (a) Temporal evolution of particle number size distribution and (b) BC concentrations measured in Lulang during 28–30 April, 2021. All time is in the UTC+8 time zone in this study.

*Comment 6: Page 12, Figure 3- Please elaborate on the start times and end times of all the NPF events.*

**Response:** Thanks for the comment. The range of start times of all NPF events is 9:00–13:30 and the range of end times is 13:00–20:10. Considering the referee’s points, we have added a table showing statistics (including the start times and end times) on NPF events in the supplementary information (Table S1 or Table. R1).

*Comment 7: Page 15, line 316-318- “The potential role of transport is also suggested by Fig. 3a, which ... especially on 29 April.”*

*Would this also suggest that there has been cluster formation somewhere else, transported, and that the growth is rather observed at the Lulang site?*

**Response:** The particle number size distribution shown in Fig. 3a reveals a high concentration of particles larger than 10 nm and relatively low concentrations of sub-10 nm particles, especially on April 29. It suggests the potential for cluster formation elsewhere followed by transport to the Lulang site. This observation aligns with our hypothesis that the observed NPF event is significantly influenced by regional transport or convective motions. We have modified the discussions in Lines 353-354 and 356-357 in revised manuscript.



*Comment 8: Page 17, line 348-350- “The typical “banana” shape particle number size distribution showing nucleation and subsequent ... a regional scale.”*

*This description could probably be added in either the measurement or the results section when describing the characteristics of NPF.*

**Response:** Thanks for the comment. We added this sentence in the results section when describing the characteristics of NPF in the revised Section 3.1 (Lines 295–297) of the manuscript.

*Comment 9: Page 16, Figure 5- It appears that on the 28th of April, there are preexisting aerosols (30 -90 nm) present in comparison to the observations. This raises the question of whether the emission inventories used in the model are consistent with the observations, a task that is challenging to maintain. Consequently, it would be good to consider what kind of uncertainties might arise from this misrepresentation, if any, in the formation of NPF.*

**Response:** Thanks for the comment. In our study, anthropogenic emissions were sourced from the mosaic Asian anthropogenic emission inventory (MIX) for the year 2010, incorporating specific emissions for China from the Multi-resolution Emission Inventory for China (MEIC) for the year 2017. The MIX inventory, designed for 2008 and 2010, amalgamates up-to-date regional emission inventories to support Model Inter-Comparison Study for Asia (MICS-Asia) and Task Force on Hemispheric Transport of Air Pollution (TF HTAP) initiatives (Li et al., 2017b). MEIC, a widely used bottom-up emission inventory model for chemical simulation in China, encompasses approximately 700 anthropogenic sources over China (Zheng et al., 2018).

It is acknowledged that emission estimates from these inventories are subject to uncertainties due to the lack of complete knowledge of human activities and emissions from different sources. Li et al. (2017b) outlined uncertainty range estimates for MIX, indicating relatively small for species dominated by large-scale combustion sources (e.g., SO<sub>2</sub>, NO<sub>x</sub>, and CO<sub>2</sub>) but larger for species mainly emitted by small-scale and scattered sources (e.g., CO, NMVOC, and carbonaceous aerosols). MEIC uncertainty range estimates were also reported (Li et al., 2017a; Zheng et al., 2018). The challenge of anthropogenic emission inventory uncertainties is particularly pronounced in the Tibetan Plateau due to data paucity and unreliable locally measured emission factors.

The mosaic process in compiling MIX introduces uncertainties from

inconsistencies among datasets, missing species, closure of mass balances, and border inconsistencies (Janssens-Maenhout et al., 2015). Moreover, gridded emissions from MIX are only available for 2008 and 2010, which may introduce temporal discrepancies. To partially address this issue, we updated the emissions in China with the MEIC inventory available for the year 2017.

As a result, the uncertainties in emission inventories, especially for NMVOC and carbonaceous aerosols, could influence the simulation of atmospheric oxidation capacity and sinks, potentially affecting the simulation of NPF. The discrepancies between model results and observations shown in Fig. 5 could be attributed to the uncertainties in emission inventories. Considering the referee's points, we have added more discussions to address the uncertainty of the emission inventories in the Section 2.2 (Lines 177–180) of the revised manuscript.

*Comment 10: Page 17, Figure 6. The model results indicate that the nucleation and growth of aerosol particles extended widely over southeastern TP. It is interesting to note that nucleation events are not observed in the northeastern part of India (below southern TP), despite its high impact from biogenic sources, ammonia from agricultural activities, and anthropogenic sources. What are the other underlying conditions that favor nucleation events more in the southern TP region? Can this be explained by the higher OH radical concentration, which is a key oxidant for forming H<sub>2</sub>SO<sub>4</sub>, observed in the southeastern TP?*

**Response:** Thanks for the comment. The extended nucleation and growth of aerosol particles over the southeastern Tibetan Plateau (TP), as indicated in Figure 6, indeed raises an interesting contrast with the lack of nucleation events in the northeastern part of India. Previous observations in the northeastern part of India (e.g. in Ranichauri and Mukteshwar) also reported infrequent new particle formation event compared to the high altitudes of TP (Venzac et al., 2008; Neitola et al., 2011; Sebastian et al., 2022). This discrepancy can be attributed to several underlying conditions.

One notable factor is the higher concentration of the hydroxyl radical (OH), a key oxidant crucial for forming sulfuric acid (H<sub>2</sub>SO<sub>4</sub>) and indicative of atmospheric oxidizing capacity. The southeastern TP exhibits elevated OH radical concentrations compared to the northeastern India, creating more favorable conditions for nucleation events. Additionally, the Tibetan Plateau, being a relatively pristine environment, experiences a significantly lower condensation sink (CS) in comparison to South Asia, as illustrated in Fig. 7c. The condensation sink quantifies the role of pre-existing particles in removing condensable vapors and newly formed particles from the atmosphere. The combination of a strong atmospheric oxidizing capacity and a low condensation sink over the Tibetan Plateau creates conditions that

are more conducive to NPF. This sheds light on the intricate interplay of atmospheric factors influencing NPF in different regions.

*Comment 11: Page 19, line 374-377- "In contrast, the OH radical concentration, which is a key oxidant for forming...ozone background over the TP".*

*The OH radical concentrations are also high over the Brahmaputra valley region and Bangladesh (Figure 7b), which are also the regions showing higher aerosols. How does the mechanism of OH formation differ over these regions from southern TP.*

**Response:** Thank you for the comment. The concentration of hydroxyl radicals (OH) is influenced by both sources and sinks. On one hand, OH is a major atmospheric oxidant primarily produced in the global troposphere through the UV photolysis of ozone (Levy, 1971). This process involves the production of electronically excited O(1D) atoms, which react with water molecules to form OH. Therefore, factors such as ozone concentration, air humidity, and UV radiation intensity determine the rate of OH generation. In the polluted lower atmosphere, OH can also be efficiently produced by the photolysis of nitrous acid (HONO) (Fu et al., 2019). It's noteworthy that hydroperoxy radicals (HO<sub>2</sub>) can react with NO to recycle back to OH, with the photolysis of formaldehyde (HCHO) serving as the primary source of HO<sub>2</sub> (Tan et al., 2019; Ehhalt and Rohrer, 2000). On the other hand, reactions with carbon monoxide (CO) and hydrocarbons constitute the major sinks for OH.

In the polluted Brahmaputra valley region and Bangladesh, as depicted in Figs. R4a and R4b, elevated levels of formaldehyde (HCHO) and nitrogen dioxide (NO<sub>2</sub>) contribute to OH production. HCHO is a precursor for the production of hydroperoxy radicals (HO<sub>2</sub>), which can further convert to OH. The high concentration of NO in these regions enhances the conversion of HO<sub>2</sub> to OH. Furthermore, the UV photolysis of ozone is promoted due to the presence of abundant ozone precursors in these polluted areas (Fig. R4c). The photolysis of HONO also contributes to OH production in the polluted Brahmaputra valley (Fig. R4e). However, it may be underestimated due to the absence of the heterogeneous generation and primary emission of HONO in the current version of model.

In the southern Tibetan Plateau (TP), OH production is facilitated by factors such as intense solar radiation, a high ozone background (Fig. R4c). The presence of abundant water vapor enhances the chemical production of OH radicals over the TP (Fig. R4d). Notably, the lower concentration of alkenes (Fig. R4f) indicates a reduced sink for OH, contributing to the higher OH concentration over the TP. We have more discussions on spatial distribution

of OH in the revised manuscript (Lines 417–419) and present Fig. R3 in the Supplement.

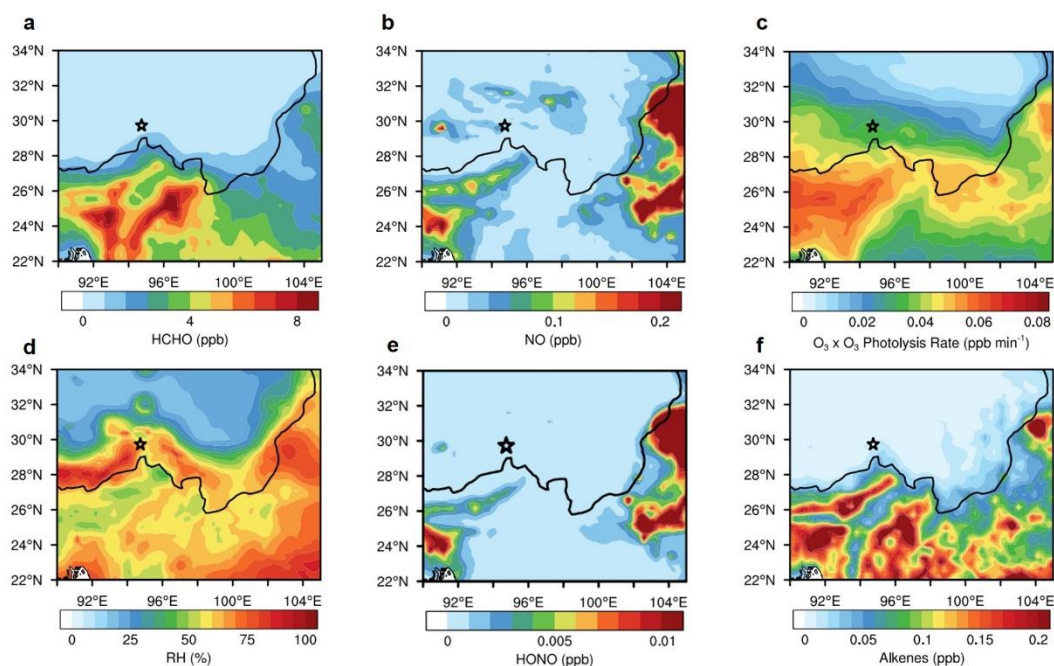

Fig. R3. Average spatial distributions of simulated near-surface (a) formaldehyde (HCHO) concentrations, (b) NO concentrations, (c)  $O_3 \times O_3$  photolysis rate, (d) relative humidity, (e) nitrous acid (HONO) concentrations, (f) alkenes concentrations during 28–30 April. Note: The black star marks the location of the Lulang site.

*Comment 12: Page 19, line 391-393- “The vertical simulation of zonal averaged wind vector and NH<sub>3</sub> concentrations over 94–96 °E ... TP.”*

*This is where the coarse resolution of the model could result in the misrepresentation of vertical velocities, which is always difficult to simulate. The Himalayan ranges have complex topography. How do you think this would impact the long-range transportation of pollutants from South Asia? For example, in Figure 8b, the transfer of pollutants across higher elevations could require both local and synoptic influences in terms of advection and vertical mixing. What do the vertical velocities look like in the model simulation?*

**Response:** Thank you for your comment. The impact of the complex topography of the Himalayas on the long-range transportation of pollutants from South Asia to the Tibetan Plateau (TP) is a crucial aspect to consider. The intricate interplay between large-scale circulation and local valley wind patterns significantly influences the transport mechanisms.

Although previous studies have confirmed the transport of pollutants across the Himalayas, the complex topography of the TP complicates transport mechanisms. On one hand, Cao et al. (2010) revealed that the Himalayas acted as a huge barrier to the transport of a large amount of BC over the plateau based on model simulations. On the other hand, some studies found that the valleys across the Himalayas served as channels for the efficient transport of pollutants (Hindman and Upadhyay, 2002; Marinoni et al., 2010).

The complex topography tends to weaken overall wind speed due to orographic drags. However, it simultaneously generates more small-scale mountain-valley circulations and enhances valley winds over the Himalayan region compared to smoother topography. Studies investigating the impact of resolution on transport processes over the TP have primarily focused on moisture using the Weather Research and Forecasting (WRF) model (Shi et al., 2008; Karki et al., 2017; Lin et al., 2018; Wang et al., 2020). These studies found that while the resolved complex topography yielded more small-scale mountain-valley circulations and enhanced valley winds, the overall moisture transport across the Himalayas towards the TP was weaker with complex topography due to orographic drags. In the contrast, Zhang et al. (2020) observed a 50% higher overall transport flux of pollutants across the Himalayas in the simulation with complex topography, even though the overall wind speed was weakened. This was primarily attributed to the strengthened efficiency of near-surface meridional transport towards the TP, the enhanced wind speed at some valleys, and the deeper valley channels associated with the complex topography.

Figs. 8a-b show that high concentrations of  $\text{NH}_3$  extending from South Asia accumulate on the southern slope of the Himalayas before overflowing into the TP region. To provide further insight into the transport pathways across the mountains, Fig. R4 illustrates the zonal-averaged vertical velocity over 94–96 °E during the daytime. Near the southern part of the mountain, elevated concentrations of  $\text{NH}_3$  accumulate, reaching heights of up to 5 km, which could be advected to the TP with the prominent southerlies (Fig. R5). Additionally, up-valley winds during the daytime favour the transport of pollutants towards the TP (Fig. R4).

Considering the referee's comments, we have added more discussions in the section 3.2 (Lines 429–434) and supplementary information in the revised

manuscript.

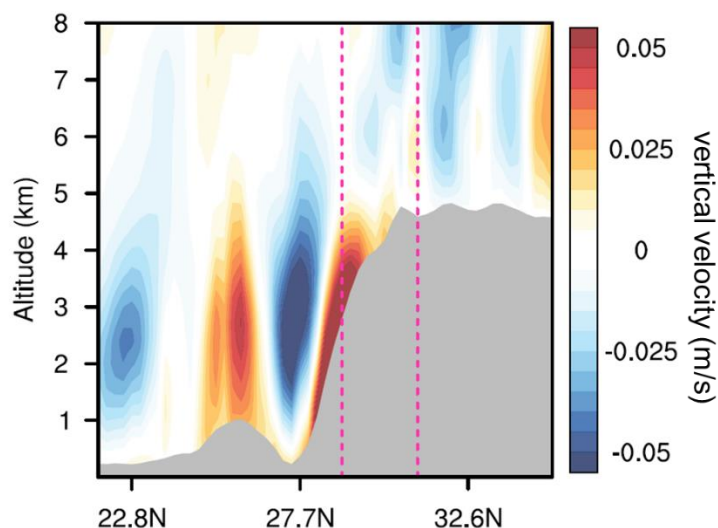

Fig. R4. Latitude–height cross sections of vertical velocity averaged along 94–96°E during the daytime (12:00–18:00 UTC+8) of 28–30 April. Note: The pink dashed lines show the location of the research domain marked in Fig.6a.

*Comment 13: Page 20, Figure 8- To understand the long-range transportation of aerosols, it would be helpful to visualize the spatial distribution of wind vectors at around 3000m.*

**Response:** Thank you for your comment. Fig. R5 illustrates the spatial distribution of wind vectors at around 3000 m together with NH<sub>3</sub> concentration. This visualization provides additional insights into the long-range transportation of pollutants, showing that the high concentration of pollutants could be advected to the Tibetan Plateau (TP) via southwesterly winds. In conjunction with the up-valley winds shown in Fig. R4, it supports to illustrate the effective transport of pollutants towards the TP.

Considering the referee's comments, we have added discussion in the section 3.2 (Lines 429–434) and supplementary information in the revised manuscript.

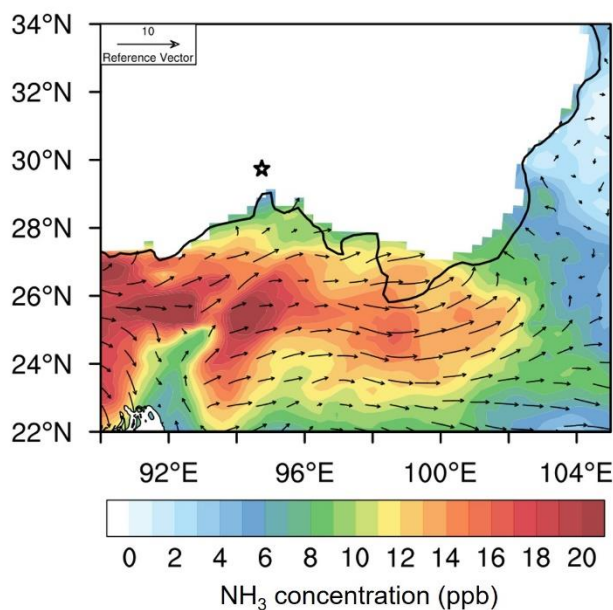

Fig. R5. Spatial distributions of simulated  $\text{NH}_3$  concentration together with wind fields at 3000 meters averaged from 12:00 to 18:00 during 28–30 April.

*Comment 14: Page 21, Figure 9: The overall contribution looks very informative. However, is it possible to examine the resultant diurnal evolution of the number of aerosol number concentrations measured vs. modeled, like Figure 5c but in terms of diurnal evolution?*

**Response:** Thank you for your comment. Fig. R6 illustrates the comparison between the observed and simulated  $\text{CN}_{1-40}$ . As depicted in the Fig. R6, the overall diurnal pattern is well captured by the simulation, despite a tendency to overestimate particle number concentrations, which could be attributed to various factors, including uncertainties in emission inventories, topography, and model resolution. The evening peak in simulated  $\text{CN}_{1-40}$  is primarily influenced by the condensation of condensable gases, with potential uncertainties arising from anthropogenic emission inventory limitations, given the scarcity of reliable data and locally measured emission factors.

It's noteworthy that WRF-Chem demonstrates good agreement in reproducing the diurnal variation and magnitude of particle number concentrations during the daytime, which aligns with the primary focus of this study. This lends overall reliability to the results.

Considering the referee's comments, we have added discussions in the section 3.3 in the revised manuscript (Lines 461–463) and Fig. R6 in Supplement Information.

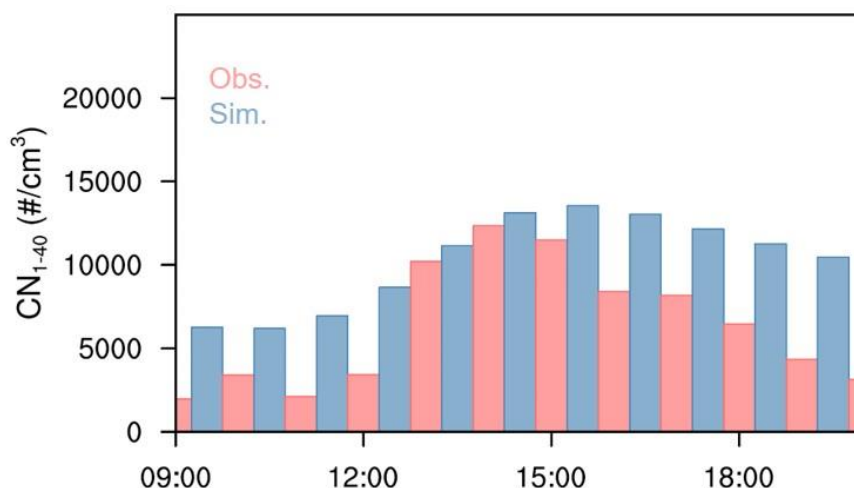

Fig. R6. Diurnal evolutions of observed and simulated 1-40 nm particle number concentrations averaged during 28–30 April over the research domain.

*Comment 15: Page 24, line 460-462- “The lower PM<sub>2.5</sub> concentration at the boundary layer top suggests a lower condensation sink ... particles (Fig. S1b).*

*Is the vertical distribution of PM<sub>2.5</sub> simulated at Lulang, or is it the spatial average?*

**Response:** Thanks for your comment. The vertical distribution of PM<sub>2.5</sub> depicted in Fig. S1b represents the averaged simulation results over the region outlined by the pink dashed rectangle in Fig. 6a during the period from 28 to 30 April.

As illustrated in Fig. 6a, our model indicates that the nucleation and growth of aerosol particles extend across a large regional expanse, spanning several thousand kilometers in the southeastern Tibetan Plateau. To provide a more comprehensive understanding of the nucleation and growth processes in this region, our analysis extends beyond Lulang to encompass the broader area marked by the pink dashed rectangle in Fig. 6a.

*Comment 16: Page 24, Figure 11b-c- The vertical mixing follows a diurnal cycle and responds to the diurnal variation of temperature, and the PBL. The lower boundary layer traps more pollutants closer to the surface, as observed in the supplementary figure. The PBL plays a significant role in the diurnal pattern of aerosol loading. So, how is this process unique concerning NPF formation? Is vertical mixing influenced by other factors such as convection or precipitation over the study location?*



**Response:** Thanks for your comment. Our investigation reveals that vertical mixing plays a pivotal role in shaping the vertical heterogeneity of new particle formation (NPF). This process significantly influences the chemistry stratification of NPF-relevant pollutants within the planetary boundary layer (PBL) by modulating the transport processes. NPF-relevant factors exhibit a non-uniform distribution vertically, primarily attributed to the evolution of the PBL. This is evident in the decreasing PM<sub>2.5</sub> concentrations with increasing altitude, acting as a sink for condensable gases and nanoparticles.

Furthermore, particles formed at NPF-preferential level would influence aerosol number concentrations at different altitudes through vertical mixing. As discussed in section 3.2, near-surface nucleation induced by anthropogenic-biogenic interactions is facilitated over the southeastern Tibetan Plateau, resulting in the formation of substantial nanoparticles. These newly formed nanoparticles are then transported upwards through vertical mixing within the PBL (Fig. 11a). During this ascent, they encounter a notable reduction in air temperature and PM<sub>2.5</sub> concentration in the upper PBL (Figs. S5b-c). These altered conditions create an environment conducive to the condensational growth of small particles (Fig. 11b), leading to an increased concentration of particles within the 10–40 nm size range in the upper air (Fig. 10c). Subsequently, the particles that undergo growth through condensation in the upper air are effectively transported back down to lower altitudes by vertical mixing (Fig. 11c). This process significantly enhances particle concentrations in the size range of 10–40 nm near the surface, as observed in the CN<sub>10–40</sub> measurements (Fig. 9b).

As NPF mostly occurred in nearly clear-sky days, the vertical mixing influenced by convection or precipitation were not considered in this study.

*Comment 17: Page 25, line 490-491- “On clear-sky days, a high frequency of NPF exceeding 60% was observed.”*

*The frequency of NPF occurrence is not clear in the current study. The measurements were conducted during the period from April 4 to May 24, 2021. Please provide details regarding the number of occurrences, start time, end time, etc. If the study is based solely on selected days, please include this clarification in the measurement section.*

**Response:** Thanks for your comments. We have added a table providing statistics on NPF events in the supplementary information, including the number of occurrences, start time, end time, formation rate and growth rate on NPF days.

Table R1 The statistics of NPF parameters in Lulang. Note: the NPF start and end time, formation rate ( $J_{1.5 \text{ nm}}$  and  $J_{3 \text{ nm}}$ ) and growth rate ( $GR_{<3 \text{ nm}}$ ,  $GR_{3-7 \text{ nm}}$ ,  $GR_{7-15 \text{ nm}}$ ) are the median values.

| Parameter                                                | Value |
|----------------------------------------------------------|-------|
| NPF frequency                                            | 21.3% |
| NPF frequency of clear-sky day                           | 66.7% |
| NPF start time (UTC+8)                                   | 11:50 |
| NPF end time (UTC+8)                                     | 17:00 |
| $J_{1.5 \text{ nm}}$ ( $\text{cm}^{-3} \text{ s}^{-1}$ ) | 1.3   |
| $J_{3 \text{ nm}}$ ( $\text{cm}^{-3} \text{ s}^{-1}$ )   | 0.2   |
| $GR_{<3 \text{ nm}}$ ( $\text{nm h}^{-1}$ )              | 0.6   |
| $GR_{3-7 \text{ nm}}$ ( $\text{nm h}^{-1}$ )             | 2.5   |
| $GR_{7-15 \text{ nm}}$ ( $\text{nm h}^{-1}$ )            | 5.4   |

## References

- Bacmeister, J. T.; Wehner, M. F.; Neale, R. B.; Gettelman, A.; Hannay, C.; Lauritzen, P. H.; Caron, J. M. , and Truesdale, J. E.: Exploratory High-Resolution Climate Simulations using the Community Atmosphere Model (CAM), *J. Clim.*, 27, 3073-3099, 10.1175/jcli-d-13-00387.1, 2014.
- Cai, R.; Chandra, I.; Yang, D.; Yao, L.; Fu, Y.; Li, X.; Lu, Y.; Luo, L.; Hao, J.; Ma, Y., et al.: Estimating the influence of transport on aerosol size distributions during new particle formation events, *Atmos. Chem. Phys.*, 18, 16587-16599, 10.5194/acp-18-16587-2018, 2018.
- Cao, J. J.; Tie, X. X.; Xu, B. Q.; Zhao, Z. Z.; Zhu, C. S.; Li, G. H. , and Liu, S. X.: Measuring and modeling black carbon (BC) contamination in the SE Tibetan Plateau, *Journal of Atmospheric Chemistry*, 67, 45-60, 10.1007/s10874-011-9202-5, 2010.
- Dal Maso, M.; Kulmala, M.; Riipinen, I.; Wagner, R.; Hussein, T.; Aalto, P. P. , and Lehtinen, K. E. J.: Formation and growth of fresh atmospheric aerosols: eight years of aerosol size distribution data from SMEAR II, Hyytiälä, Finland, *Boreal Environ. Res.*, 10, 323-336, 2005.
- Ding, A. J.; Huang, X.; Nie, W.; Sun, J. N.; Kerminen, V. M.; Petäjä, T.; Su, H.; Cheng, Y. F.; Yang, X. Q.; Wang, M. H., et al.: Enhanced haze pollution by black carbon in megacities in China, *Geophys. Res. Lett.*, 43, 2873-2879, 10.1002/2016gl067745, 2016.
- Ehhalt, D. H. , and Rohrer, F.: Dependence of the OH concentration on solar UV, *J. Geophys. Res.-Atmos.*, 105, 3565-3571, 10.1029/1999jd901070, 2000.
- Fu, X.; Wang, T.; Zhang, L.; Li, Q. Y.; Wang, Z.; Xia, M.; Yun, H.; Wang, W. H.; Yu, C.; Yue, D. L., et al.: The significant contribution of HONO to secondary pollutants during a severe winter pollution event in southern China, *Atmos. Chem. Phys.*, 19, 1-14, 10.5194/acp-19-1-2019, 2019.
- Gao, Y. H.; Xiao, L. H.; Chen, D. L.; Xu, J. W. , and Zhang, H. W.: Comparison between past and future extreme precipitations simulated by global and regional climate models over the Tibetan Plateau, *Int. J. Climatol.*, 38, 1285-1297, 10.1002/joc.5243, 2018.

- Guenther, A.; Karl, T.; Harley, P.; Wiedinmyer, C.; Palmer, P. I. , and Geron, C.: Estimates of global terrestrial isoprene emissions using MEGAN (Model of Emissions of Gases and Aerosols from Nature), *Atmos. Chem. Phys.*, 6, 3181-3210, 10.5194/acp-6-3181-2006, 2006.
- Hart, K. A.; Steenburgh, W. J. , and Onton, D. J.: Model forecast improvements with decreased horizontal grid spacing over finescale intermountain orography during the 2002 Olympic Winter Games, *Weather and Forecasting*, 20, 558-576, 10.1175/waf865.1, 2005.
- Hindman, E. E. , and Upadhyay, B. P.: Air pollution transport in the Himalayas of Nepal and Tibet during the 1995–1996 dry season, *Atmos. Environ.*, 36, 727-739, [https://doi.org/10.1016/S1352-2310\(01\)00495-2](https://doi.org/10.1016/S1352-2310(01)00495-2), 2002.
- Huang, X.; Ding, A.; Wang, Z.; Ding, K.; Gao, J.; Chai, F. , and Fu, C.: Amplified transboundary transport of haze by aerosol–boundary layer interaction in China, *Nat. Geosci.*, 13, 428-434, 10.1038/s41561-020-0583-4, 2020.
- Jain, S.; Mishra, S. K.; Salunke, P. , and Sahany, S.: Importance of the resolution of surface topography vis-a-vis atmospheric and surface processes in the simulation of the climate of Himalaya-Tibet highland, *Clim. Dyn.*, 52, 4735-4748, 10.1007/s00382-018-4411-0, 2019.
- Janssens-Maenhout, G.; Crippa, M.; Guizzardi, D.; Dentener, F.; Muntean, M.; Pouliot, G.; Keating, T.; Zhang, Q.; Kurokawa, J.; Wankmüller, R., et al.: HTAP\_v2.2: a mosaic of regional and global emission grid maps for 2008 and 2010 to study hemispheric transport of air pollution, *Atmos. Chem. Phys.*, 15, 11411-11432, 10.5194/acp-15-11411-2015, 2015.
- Karki, R.; ul Hasson, S.; Gerlitz, L.; Schickhoff, U.; Scholten, T. , and Böhner, J.: Quantifying the added value of convection-permitting climate simulations in complex terrain: a systematic evaluation of WRF over the Himalayas, *Earth System Dynamics*, 8, 507-528, 10.5194/esd-8-507-2017, 2017.
- Kulmala, M.; Petaja, T.; Nieminen, T.; Sipila, M.; Manninen, H. E.; Lehtipalo, K.; Dal Maso, M.; Aalto, P. P.; Junninen, H.; Paasonen, P., et al.: Measurement of the nucleation of atmospheric aerosol particles, *Nat Protoc*, 7, 1651-1667, 10.1038/nprot.2012.091, 2012.
- Levy, H.: NORMAL ATMOSPHERE - LARGE RADICAL AND FORMALDEHYDE CONCENTRATIONS PREDICTED, *Science*, 173, 141-&, 10.1126/science.173.3992.141, 1971.
- Li, J.; Yu, R. C.; Yuan, W. H.; Chen, H. M.; Sun, W. , and Zhang, Y.: Precipitation over East Asia simulated by NCAR CAM5 at different horizontal resolutions, *Journal of Advances in Modeling Earth Systems*, 7, 774-790, 10.1002/2014ms000414, 2015.
- Li, M.; Liu, H.; Geng, G. N.; Hong, C. P.; Liu, F.; Song, Y.; Tong, D.; Zheng, B.; Cui, H. Y.; Man, H. Y., et al.: Anthropogenic emission inventories in China: a review, *Natl. Sci. Rev.*, 4, 834-866, 10.1093/nsr/nwx150, 2017a.
- Li, M.; Zhang, Q.; Kurokawa, J.; Woo, J. H.; He, K. B.; Lu, Z. F.; Ohara, T.; Song, Y.; Streets, D. G.; Carmichael, G. R., et al.: MIX: a mosaic Asian anthropogenic emission inventory under the international collaboration framework of the MICS-Asia and HTAP, *Atmos. Chem. Phys.*, 17, 935-963, 10.5194/acp-17-935-2017, 2017b.
- Lin, C. G.; Chen, D. L.; Yang, K. , and Ou, T. H.: Impact of model resolution on simulating the water vapor transport through the central Himalayas: implication for models' wet bias over the Tibetan Plateau, *Clim. Dyn.*, 51, 3195-3207, 10.1007/s00382-018-4074-x, 2018.
- Lindzen, R. S.; Farrell, B. , and Rosenthal, A. J.: ABSOLUTE BAROTROPIC INSTABILITY AND MONSOON DEPRESSIONS, *J Atmos Sci*, 40, 1178-1184, 10.1175/1520-0469(1983)040<1178:Abiamd>2.0.Co;2, 1983.
- Marinoni, A.; Cristofanelli, P.; Laj, P.; Duchi, R.; Calzolari, F.; Decesari, S.; Sellegri, K.; Vuillermoz, E.;

- Verza, G. P.; Villani, P., et al.: Aerosol mass and black carbon concentrations, a two year record at NCO-P (5079 m, Southern Himalayas), *Atmos. Chem. Phys.*, 10, 8551-8562, 10.5194/acp-10-8551-2010, 2010.
- Mishra, S. K.; Anand, A.; Fasullo, J. , and Bhagat, S.: Importance of the Resolution of Surface Topography in Indian Monsoon Simulation, *J. Clim.*, 31, 4879-4898, 10.1175/jcli-d-17-0324.1, 2018.
- Neitola, K.; Asmi, E.; Komppula, M.; Hyvärinen, A. P.; Raatikainen, T.; Panwar, T. S.; Sharma, V. P. , and Lihavainen, H.: New particle formation infrequently observed in Himalayan foothills – why?, *Atmos. Chem. Phys.*, 11, 8447-8458, 10.5194/acp-11-8447-2011, 2011.
- Rai, M.; Kang, S. C.; Yang, J. H.; Chen, X. T.; Hu, Y. L. , and Rupakheti, D.: Tracing Atmospheric Anthropogenic Black Carbon and Its Potential Radiative Response Over Pan-Third Pole Region: A Synoptic-Scale Analysis Using WRF-Chem, *J. Geophys. Res.-Atmos.*, 127, 26, 10.1029/2021jd035772, 2022.
- Sato, T.; Yoshikane, T.; Satoh, M.; Miltra, H. , and Fujinami, H.: Resolution Dependency of the Diurnal Cycle of Convective Clouds over the Tibetan Plateau in a Mesoscale Model, *J. Meteorol. Soc. Jpn.*, 86A, 17-31, 10.2151/jmsj.86A.17, 2008.
- Sebastian, M.; Kompalli, S. K.; Kumar, V. A.; Jose, S.; Babu, S. S.; Pandithurai, G.; Singh, S.; Hooda, R. K.; Soni, V. K.; Pierce, J. R., et al.: Observations of particle number size distributions and new particle formation in six Indian locations, *Atmos. Chem. Phys.*, 22, 4491-4508, 10.5194/acp-22-4491-2022, 2022.
- Shi, X. Y.; Wang, Y. Q. , and Xu, X. D.: Effect of mesoscale topography over the Tibetan Plateau on summer precipitation in China: A regional model study, *Geophys. Res. Lett.*, 35, 5, 10.1029/2008gl034740, 2008.
- Tan, Z. F.; Lu, K. D.; Hofzumahaus, A.; Fuchs, H.; Bohn, B.; Holland, F.; Liu, Y. H.; Rohrer, F.; Shao, M.; Sun, K., et al.: Experimental budgets of OH, HO<sub>2</sub>, and RO<sub>2</sub> radicals and implications for ozone formation in the Pearl River Delta in China 2014, *Atmos. Chem. Phys.*, 19, 7129-7150, 10.5194/acp-19-7129-2019, 2019.
- Tang, L.; Hu, M.; Shang, D.; Fang, X.; Mao, J.; Xu, W.; Zhou, J.; Zhao, W.; Wang, Y.; Zhang, C., et al.: High frequency of new particle formation events driven by summer monsoon in the central Tibetan Plateau, China, *Atmos. Chem. Phys.*, 23, 4343-4359, 10.5194/acp-23-4343-2023, 2023.
- Venzac, H.; Sellegri, K.; Laj, P.; Villani, P.; Bonasoni, P.; Marinoni, A.; Cristofanelli, P.; Calzolari, F.; Fuzzi, S.; Decesari, S., et al.: High frequency new particle formation in the Himalayas, *Proc. Natl. Acad. Sci. U. S. A.*, 105, 15666-15671, 10.1073/pnas.0801355105, 2008.
- Wang, Y.; Yang, K.; Zhou, X.; Chen, D. L.; Lu, H.; Ouyang, L.; Chen, Y. Y.; Lazhu , and Wang, B. B.: Synergy of orographic drag parameterization and high resolution greatly reduces biases of WRF-simulated precipitation in central Himalaya, *Clim. Dyn.*, 54, 1729-1740, 10.1007/s00382-019-05080-w, 2020.
- Wehner, M. F.; Reed, K. A.; Li, F. Y.; Prabhat; Bacmeister, J.; Chen, C. T.; Paciorek, C.; Gleckler, P. J.; Sperber, K. R.; Collins, W. D., et al.: The effect of horizontal resolution on simulation quality in the Community Atmospheric Model, CAM5.1, *Journal of Advances in Modeling Earth Systems*, 6, 980-997, 10.1002/2013ms000276, 2014.
- Xu, J. W.; Koldunov, N.; Remedio, A. R. C.; Sein, D. V.; Zhi, X. F.; Jiang, X.; Xu, M.; Zhu, X. H.; Fraedrich, K. , and Jacob, D.: On the role of horizontal resolution over the Tibetan Plateau in the REMO regional climate model, *Clim. Dyn.*, 51, 4525-4542, 10.1007/s00382-018-4085-7, 2018.
- Yang, J. H.; Kang, S. C.; Ji, Z. M. , and Chen, D. L.: Modeling the Origin of Anthropogenic Black Carbon

- and Its Climatic Effect Over the Tibetan Plateau and Surrounding Regions, *J. Geophys. Res.-Atmos.*, 123, 671-692, 10.1002/2017jd027282, 2018.
- Yu, R. C.; Li, J.; Zhang, Y. , and Chen, H. M.: Improvement of rainfall simulation on the steep edge of the Tibetan Plateau by using a finite-difference transport scheme in CAM5, *Clim. Dyn.*, 45, 2937-2948, 10.1007/s00382-015-2515-3, 2015.
- Zhang, H. L.; Pu, Z. X. , and Zhang, X. B.: Examination of Errors in Near-Surface Temperature and Wind from WRF Numerical Simulations in Regions of Complex Terrain, *Weather and Forecasting*, 28, 893-914, 10.1175/waf-d-12-00109.1, 2013.
- Zhang, M. X.; Zhao, C.; Cong, Z. Y.; Du, Q. Y.; Xu, M. Y.; Chen, Y.; Chen, M.; Li, R.; Fu, Y. F.; Zhong, L., et al.: Impact of topography on black carbon transport to the southern Tibetan Plateau during the pre-monsoon season and its climatic implication, *Atmos. Chem. Phys.*, 20, 5923-5943, 10.5194/acp-20-5923-2020, 2020.
- Zheng, B.; Tong, D.; Li, M.; Liu, F.; Hong, C.; Geng, G.; Li, H.; Li, X.; Peng, L.; Qi, J., et al.: Trends in China's anthropogenic emissions since 2010 as the consequence of clean air actions, *Atmos. Chem. Phys.*, 18, 14095-14111, 10.5194/acp-18-14095-2018, 2018.
